# Supplementary material for: Magnetism in the (Co1−xFex)2(OH)2(C8H4O4) solid solutions: a combined neutron diffraction and magnetic measurements study
Source: Royal Society of Chemistry journal article supplement (doi:10.1039/c0jm01802c), 2010-01-01

## Magnetism in the $(\text{Co}_{1-x}\text{Fe}_x)_2(\text{OH})_2(\text{C}_8\text{H}_4\text{O}_4)$ solid solutions: a combined neutron diffraction and magnetic measurements study†

Adel Meşbah<sup>a</sup>, Romain Sibille<sup>a</sup>, Thomas Mazet<sup>a</sup>, Bernard Malaman<sup>a</sup>, Sébastien Lebègue<sup>b</sup> and Michel François<sup>a</sup>

### Supplementary Information

Table S1 : Metallic composition of samples 1, 2, 3 and 4 by electron probe microanalysis

| Sample | Formula                            | Calculated (wt%) | Found (wt%) |
|--------|------------------------------------|------------------|-------------|
| 1      | $\text{Co}_{0.75}\text{Fe}_{0.25}$ | 88               | 88.3        |
| 2      | $\text{Co}_{0.5}\text{Fe}_{0.5}$   | 75               | 71.75       |
| 3      | $\text{Co}_{0.25}\text{Fe}_{0.75}$ | 50               | 47          |
| 4      | $\text{Co}_{0.12}\text{Fe}_{0.88}$ | 25               | 24.92       |

Fig. S1 : Rietveld refinements of the neutron data of the solid solutions  $\text{Co}_{2-x}\text{Fe}_x(\text{OH})_2(\text{C}_8\text{H}_4\text{O}_4)$  at 2 K ( $\lambda = 2,50$  Angstroems).

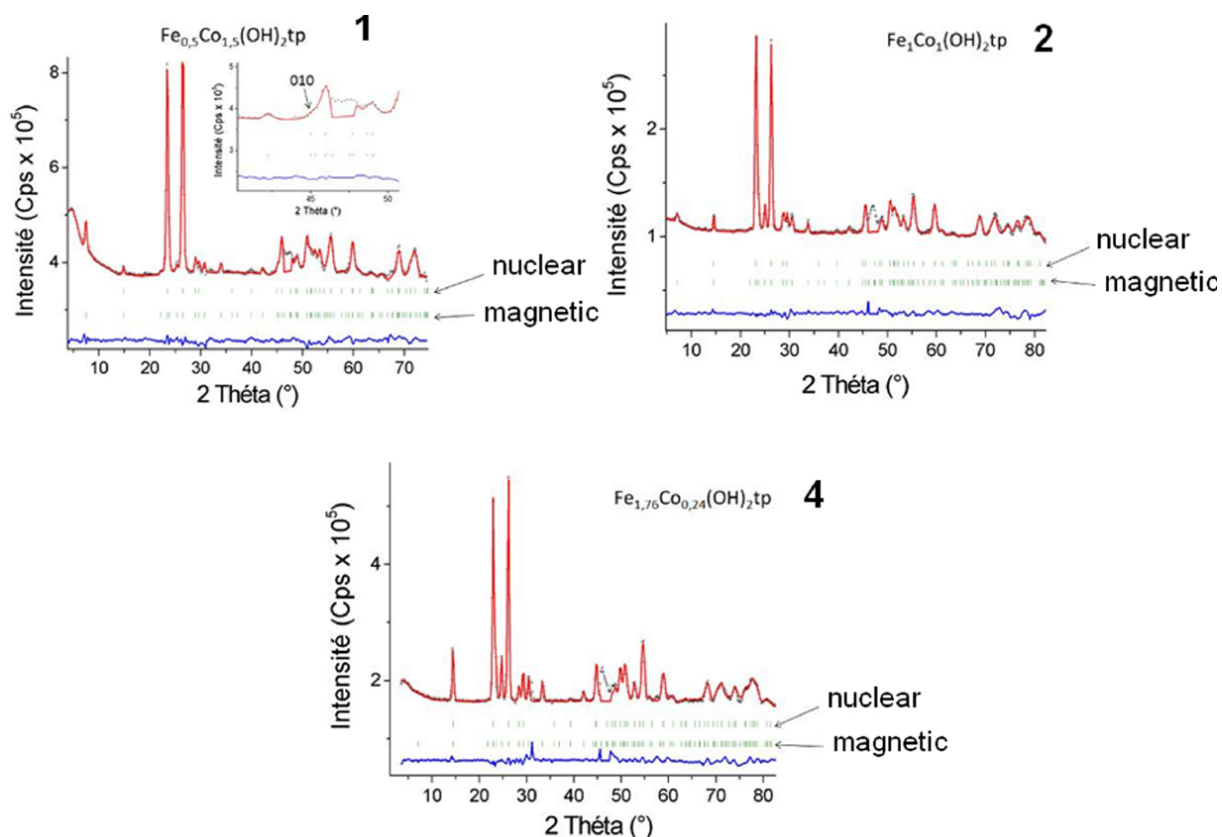

Supplement: c0jm01802c.pdf [file c0jm01802c.pdf]
